# Supplementary material for: Effects of Secretoneurin and Gonadotropin-Releasing Hormone Agonist on the Spawning of Captive Greater Amberjack (Seriola dumerili)
Source: MDPI journal article supplement (doi:10.3390/life12091457), 2022-09-19
Supplement: s1 [file s1]

**Supplemental Table S1**

GeneBank IDs of secretogranin-2 protein sequences used for comparative homology analysis.

| <b>Species name</b>             | <b>Accession number</b> |
|---------------------------------|-------------------------|
| <i>Xenopus tropicalis</i>       | NP_001072311.1          |
| <i>Homo sapiens</i>             | NP_003460.2             |
| <i>Mus musculus</i> (isoform 1) | NP_033155.1             |
| <i>Mus musculus</i> (isoform 2) | NP_001297609.1          |
| <i>Varanus komodoensis</i>      | XP_044288914.1          |
| <i>Mauremys mutica</i>          | XP_044885074.1          |
| <i>Gallus gallus</i>            | XP_040535214.1          |
| <i>Danio rerio</i>              | XP_009290228.1          |
| <i>Oryzias melastigma</i>       | XP_024133635.1          |
| <i>Oryzias latipes</i>          | XP_004075761.1          |
| <i>Monopterus albus</i>         | XP_020441343.1          |
| <i>Echeneis naucrates</i>       | XP_029374128.1          |
| <i>Seriola dumerili</i>         | XP_022616204.1          |
| <i>Seriola lalandi dorsalis</i> | XP_023284183.1          |

**Supplemental Table S2**

GeneBank IDs of gonadotropin-releasing hormone protein sequences used in this study.

| <b>Species name</b>             | <b>Accession number</b> |
|---------------------------------|-------------------------|
| <i>Oryzias latipes</i>          | NP_001098169.1          |
| <i>Monopterus albus</i>         | AAW51121.1              |
| <i>Echeneis naucrates</i>       | XP_029365716.1          |
| <i>Sebastes schlegelii</i>      | AFS52222.1              |
| <i>Seriola dumerili</i>         | XP_022612160.1          |
| <i>Seriola lalandi dorsalis</i> | XP_023249933.1          |
| <i>Xenopus tropicalis</i>       | XP_031753457.1          |
| <i>Mus musculus</i>             | NP_032171.1             |
| <i>Homo sapiens</i>             | NP_000816.4             |
| <i>Mauremys mutica</i>          | XP_044860640.1          |
| <i>Gallus gallus</i>            | NP_001074346.1          |
